# Supplementary material for: Trends and Risk Factors Associated With Stroke Recurrence in China, 2007-2018
Source: PubMed Central journal article supplement (PMC9201671; doi:10.1001/jamanetworkopen.2022.16341), 2022-06-15
Supplement: jamanetwopen-e2216341-s001.pdf [file jamanetwopen-e2216341-s001.pdf]

## Supplemental Online Content

Xu J, Zhang X, Jin A, et al. Trends and risk factors associated with stroke recurrence in China, 2007-2018. *JAMA Netw Open*. 2022;5(6):e2216341. doi:10.1001/jamanetworkopen.2022.16341

### **eMethods.**

**eTable 1.** Sensitivity Analysis on Patients From 33 Hospitals Included in China National Stroke Registry (CNSR) I and III

**eTable 2.** Sensitivity Analysis With Death Excluded

**eFigure 1.** Flowchart of Patient Selection

**eFigure 2.** Regression Model of Factors Associated With Stroke Recurrence Using Imputed Low-Density Lipoprotein Cholesterol (LDL-C) Data

### **eReferences.**

This supplemental material has been provided by the authors to give readers additional information about their work.

## eMethods

### Definitions of variables

Hypertension was defined as a self-reported history of hypertension, or taking oral antihypertension drugs, or documented to have hypertension in hospital admissions (blood pressure of 140/90 mmHg or higher). Diabetes mellitus was defined as a self-reported history of diabetes mellitus, or taking oral hypoglycemic agents/insulin. Coronary artery disease was defined as a self-reported history of coronary artery disease, or confirmed to have coronary artery disease or coronary artery disease by a cardiologist in hospital admissions. Atrial fibrillation was defined as a history of atrial fibrillation, confirmed by at least one electrocardiogram, or the presence of the arrhythmia during hospitalization.

We focused on 5 evidence-based secondary preventive interventions, including antiplatelet, statins, anticoagulant, antihypertensive, and antidiabetic. (1) Antiplatelet therapy was given to patients with no contraindications. (2) Anticoagulation was administered if the patient had a clear indication (presumed cardiac source of embolus, such as atrial fibrillation or prosthetic cardiac valve). (3) Antihypertensive therapy was given to those with hypertension and with no contraindications. (4) Antidiabetic therapy was given to those with diabetes mellitus and with no contraindications. (5) As for the use of statins, both the CNSR I and CNSR III studies were conducted after publication of the SPARCL study(1), when the use of statins was gradually proposed and applied in acute ischemic cerebrovascular events. Statins were given to patients with no contraindications.

### Information on hospitals of study patients

|                | Hospitals, No. (%)               |                                    |                                                   |
|----------------|----------------------------------|------------------------------------|---------------------------------------------------|
|                | 132 hospitals included in CNSR I | 164 hospitals included in CNSR III | 33 hospitals included both in CNSR I and CNSR III |
| Hospital type  |                                  |                                    |                                                   |
| Grade II       | 32 (24.2)                        | 31 (18.9)                          | 3 (9.1)                                           |
| Grade III      | 100 (75.8)                       | 133 (81.1)                         | 30 (90.9)                                         |
| Region         |                                  |                                    |                                                   |
| East           | 79 (59.8)                        | 98 (59.8)                          | 22 (66.7)                                         |
| Central        | 32 (24.2)                        | 56 (34.1)                          | 7 (21.2)                                          |
| West           | 21 (15.9)                        | 10 (6.1)                           | 4 (12.1)                                          |
| Economic zones |                                  |                                    |                                                   |
| Northeast      | 20 (15.2)                        | 11 (6.7)                           | 4 (12.1)                                          |
| North China    | 32 (24.2)                        | 54 (32.9)                          | 9 (27.3)                                          |
| Eastern China  | 35 (26.5)                        | 47 (28.7)                          | 12 (36.4)                                         |
| Northwest      | 13 (9.8)                         | 6 (3.7)                            | 3 (9.1)                                           |

|                                 |                  |                    |                    |
|---------------------------------|------------------|--------------------|--------------------|
| Southwest                       | 8 (6.1)          | 4 (2.4)            | 1 (3.0)            |
| Central and Southern China      | 24 (18.2))       | 42 (14.6)          | 4 (12.1)           |
| Infrastructures                 |                  |                    |                    |
| Number of beds in total*        | 800 (150, 2,500) | 1,255 (500, 2,000) | 1,600 (750, 3,200) |
| Number of beds in ND            | 45 (20, 176)     | 107 (40, 280)      | 104 (40, 280)      |
| Stroke out-patients clinic      | 112 (84.8)       | 140 (85.4)         | 27 (81.8)          |
| Emergency department            | 81 (61.4)        | 164 (100)          | 33 (100)           |
| NICU                            | 78 (59.1)        | 113 (68.9)         | 28 (84.8)          |
| Stroke Unit                     | 39 (29.5)        | 126 (76.8)         | 28 (84.8)          |
| Inpatients' rehabilitation      | 92 (69.7))       | 162 (98.8)         | 33 (100)           |
| Personnel                       |                  |                    |                    |
| Neurological rehabilitators     | 97 (73.5)        | 145 (88.4))        | 28 (84.8)          |
| Speech therapist                | 52 (39.4)        | 124 (75.6)         | 22 (66.7)          |
| Physiotherapist                 | 45 (34.1)        | 158 (96.3)         | 32 (97.0)          |
| Diagnostic procedure            |                  |                    |                    |
| Brain CT scan                   | 85 (64.4)        | 164 (100)          | 33 (100)           |
| Digital subtraction angiography | 112 (84.8)       | 150 (91.5)         | 32 (97.0)          |
| Extracranial duplex sonography  | 121 (91.7)       | 158 (96.3)         | 29 (87.9)          |

\*median with the 5<sup>th</sup>-95<sup>th</sup> percentile.

Abbreviation: CNSR I= the China National Stroke Registry; CNSR III= the Third China National Stroke Registry; ND= Neurology Department; NICU= Neurological Intensive Care Unit

### List of the medications in each category

|                | In CNSR I                       | In CNSR III           |
|----------------|---------------------------------|-----------------------|
| Antiplatelets  |                                 |                       |
|                | Aspirin                         | Aspirin               |
|                | Clopidogrel                     | Clopidogrel           |
|                | Dipyrid amole                   | Dipyrid amole         |
|                | Ticlopidine                     | Cilostazol            |
|                | Aspirin/Dipyrid amole           | Ozagrel               |
|                | GP IIb/IIIa receptor antagonist | Others                |
| Anticoagulants |                                 |                       |
|                | Warfarin                        | Warfarin              |
|                | Low molecular heparin           | Low molecular heparin |

|                   |                                         |                                         |
|-------------------|-----------------------------------------|-----------------------------------------|
|                   | Heparin                                 | Heparin                                 |
|                   | Others                                  | Rivaroxaban                             |
|                   |                                         | Dabigatran                              |
|                   |                                         | Apixaban                                |
|                   |                                         | Others                                  |
| Hypoglycemics     |                                         |                                         |
|                   | Insulin                                 | Insulin                                 |
|                   | Biguanides                              | Biguanides                              |
|                   | Sulfonylureas                           | Sulfonylureas                           |
|                   | Alpha glycosidase inhibitor             | Alpha glycosidase inhibitor             |
|                   | Others                                  | Thiazolidinediones                      |
|                   |                                         | Glinides                                |
|                   |                                         | Others                                  |
| Antihypertensives |                                         |                                         |
|                   | Calcium ion antagonist                  | Calcium ion antagonist                  |
|                   | Angiotensin converting enzyme inhibitor | Angiotensin converting enzyme inhibitor |
|                   | Diuretic                                | Angiotensin II receptor antagonist      |
|                   | Beta blockers                           | Diuretic                                |
|                   | Alpha blockers                          | Beta blockers                           |
|                   |                                         | Alpha blockers                          |
|                   |                                         | Alpha/beta blockers                     |
|                   |                                         | Others                                  |
| Statins           |                                         |                                         |
|                   | /*                                      | Atorvastatin                            |
|                   |                                         | Rosuvastatin                            |
|                   |                                         | Simvastatin                             |
|                   |                                         | Pravastatin                             |
|                   |                                         | Lovastatin                              |
|                   |                                         | Fluvastatin                             |
|                   |                                         | Pitavastatin                            |

\* The information regarding the specific categories of statins was not collected in CNSR I.

**eTable 1.** Sensitivity Analysis on Patients From 33 Hospitals Included in China National Stroke Registry (CNSR) I and III

| Variables                            | Stroke recurrence in 12 months |         |                      |         |
|--------------------------------------|--------------------------------|---------|----------------------|---------|
|                                      | CNSR I, n=2,233                |         | CNSR III, n=2,723    |         |
|                                      | Adjusted OR (95% CI)           | P value | Adjusted OR (95% CI) | p value |
| Age, per 10 years                    | 1.20 (1.08-1.34)               | 0.001   | 1.07 (0.95-1.22)     | 0.28    |
| Men                                  | 0.96 (0.74-1.25)               | 0.76    | 0.82 (0.60-1.13)     | 0.23    |
| Education level                      |                                |         |                      |         |
| ≤Elementary school                   | Ref.                           |         | Ref.                 |         |
| Middle school                        | 0.90 (0.67-1.22)               | 0.51    | 1.10 (0.76-1.59)     | 0.62    |
| ≥High school                         | 0.91 (0.67-1.23)               | 0.53    | 1.01 (0.69-1.47)     | 0.97    |
| Unknown                              |                                |         | 0.92 (0.61-1.38)     | 0.67    |
| Current smoking                      | 0.79 (0.56-1.10)               | 0.16    | 0.88 (0.62-1.23)     | 0.45    |
| Current drinking                     | 0.93 (0.67-1.27)               | 0.64    | 1.24 (0.85-1.81)     | 0.26    |
| Medical History                      |                                |         |                      |         |
| Prior stroke                         | 1.69 (1.34-2.14)               | <0.001  | 1.56 (1.16-2.09)     | 0.003   |
| Hypertension                         | 1.12 (0.88-1.42)               | 0.37    | 1.14 (0.85-1.51)     | 0.39    |
| Diabetes                             | 1.15 (0.88-1.50)               | 0.31    | 1.26 (0.95-1.67)     | 0.12    |
| Coronary artery disease              | 1.41 (1.06-1.91)               | 0.02    | 1.03 (0.68-1.55)     | 0.90    |
| Atrial fibrillation                  | 1.05 (0.70-1.56)               | 0.82    | 0.94 (0.56-1.59)     | 0.82    |
| NIHSS score on admission, per 1 unit | 1.05 (1.03-1.06)               | <0.001  | 1.03 (1.003-1.06)    | 0.03    |
| LDL-C level, per 10 mg/dL            | 1.02 (0.99-1.05)               | 0.23    | 1.003 (0.97-1.04)    | 0.86    |
| Thrombolytic therapy                 | 1.11 (0.67-1.84)               | 0.69    | 0.99 (0.58-1.67)     | 0.97    |
| Statin use                           | 1.08 (0.84-1.40)               | 0.55    | 0.79 (0.50-1.26)     | 0.32    |
| Antiplatelet therapy                 | 0.59 (0.45-0.76)               | <0.001  | 0.83 (0.52-1.33)     | 0.44    |

Abbreviation: CNSR I= the China National Stroke Registry; CNSR III= the Third China National Stroke Registry; OR= odds ratio; CI= confidence interval; NIHSS=National Institutes of Health Stroke Scale; LDL-C=low density lipoprotein cholesterol.

**eTable 2.** Sensitivity Analysis With Death Excluded

| Variables                            | Stroke recurrence in 12 months |            |                         |            |
|--------------------------------------|--------------------------------|------------|-------------------------|------------|
|                                      | CNSR I, n=8,389                |            | CNSR III, n=10,014      |            |
|                                      | Adjusted OR<br>(95% CI)        | p<br>value | Adjusted OR<br>(95% CI) | p<br>value |
| Age, per 10 years                    | 1.03 (0.96-1.10)               | 0.37       | 1.06 (0.99-1.14)        | 0.08       |
| Men                                  | 1.13 (0.95-1.34)               | 0.17       | 0.89 (0.76-1.06)        | 0.19       |
| Education level                      |                                |            |                         |            |
| ≤Elementary school                   | Ref.                           |            | Ref.                    |            |
| Middle school                        | 1.02 (0.85-1.22)               | 0.88       | 1.12 (0.93-1.36)        | 0.24       |
| ≥High school                         | 1.08 (0.90-1.29)               | 0.41       | 1.11 (0.91-1.35)        | 0.30       |
| Unknown                              |                                |            | 1.22 (0.98-1.52)        | 0.08       |
| Current smoking                      | 0.94 (0.78-1.13)               | 0.48       | 0.88 (0.74-1.06)        | 0.18       |
| Current drinking                     | 0.90 (0.75-1.08)               | 0.25       | 1.23 (1.002-1.51)       | 0.05       |
| Medical History                      |                                |            |                         |            |
| Prior stroke                         | 1.65 (1.43-1.91)               | <0.001     | 1.62 (1.39-1.89)        | <0.001     |
| Hypertension                         | 1.14 (0.97-1.33)               | 0.11       | 1.05 (0.90-1.21)        | 0.55       |
| Diabetes                             | 1.22 (1.03-1.43)               | 0.02       | 1.17 (1.01-1.37)        | 0.04       |
| Coronary artery disease              | 1.50 (1.25-1.81)               | <0.001     | 1.24 (1.01-1.53)        | 0.04       |
| Atrial fibrillation                  | 1.44 (1.10-1.87)               | 0.007      | 0.91 (0.68-1.21)        | 0.51       |
| NIHSS score on admission, per 1 unit | 1.004 (0.99-1.02)              | 0.51       | 1.01 (0.997-1.03)       | 0.12       |
| LDL-C level, per 10 mg/dL            | 1.01 (0.99-1.03)               | 0.25       | 1.02 (1.005-1.04)       | 0.01       |
| Thrombolytic therapy                 | 1.67 (1.22-2.29)               | 0.001      | 1.16 (0.92-1.45)        | 0.22       |
| Statin use                           | 1.04 (0.89-1.21)               | 0.66       | 0.84 (0.54-1.10)        | 0.21       |
| Antiplatelet therapy                 | 0.90 (0.77-1.07)               | 0.23       | 0.69 (0.53-0.90)        | 0.007      |

Abbreviation: CNSR I= the China National Stroke Registry; CNSR III= the Third China National Stroke Registry; OR= odds ratio; CI= confidence interval; NIHSS=National Institutes of Health Stroke Scale; LDL-C=low density lipoprotein cholesterol.

eFigure 1. Flowchart of Patient Selection

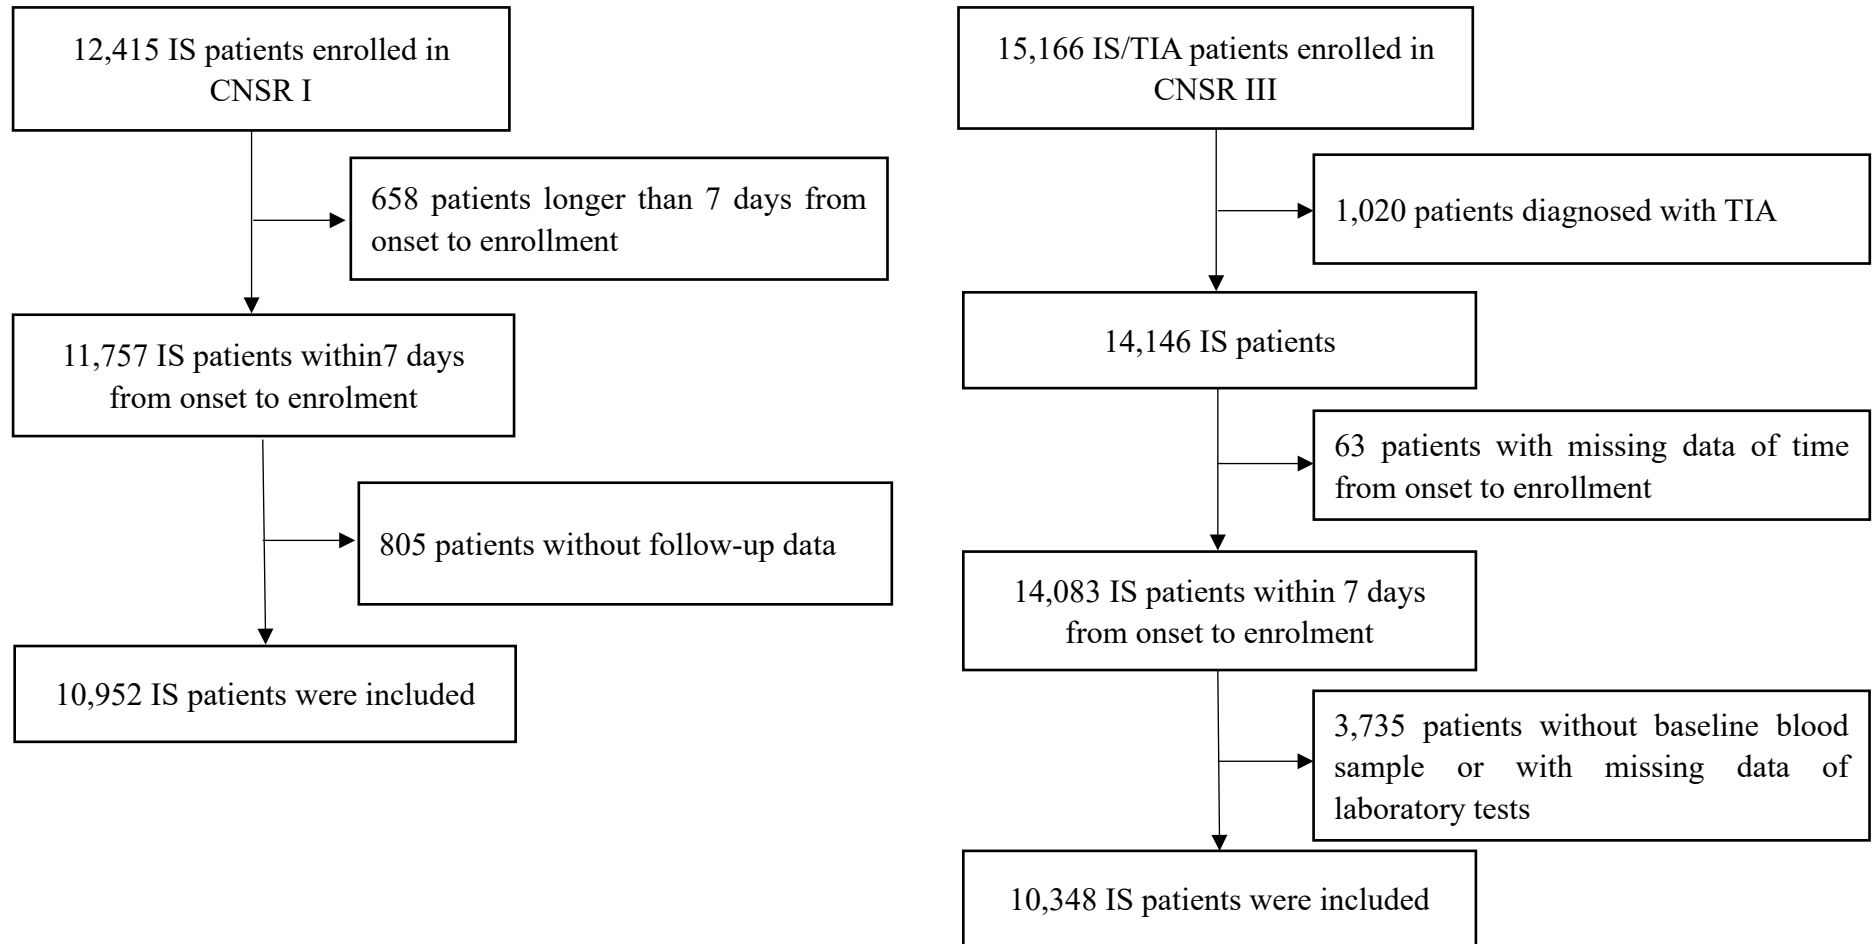

**eFigure 2.** Regression Model of Factors Associated With Stroke Recurrence Using Imputed Low-Density Lipoprotein Cholesterol (LDL-C) Data

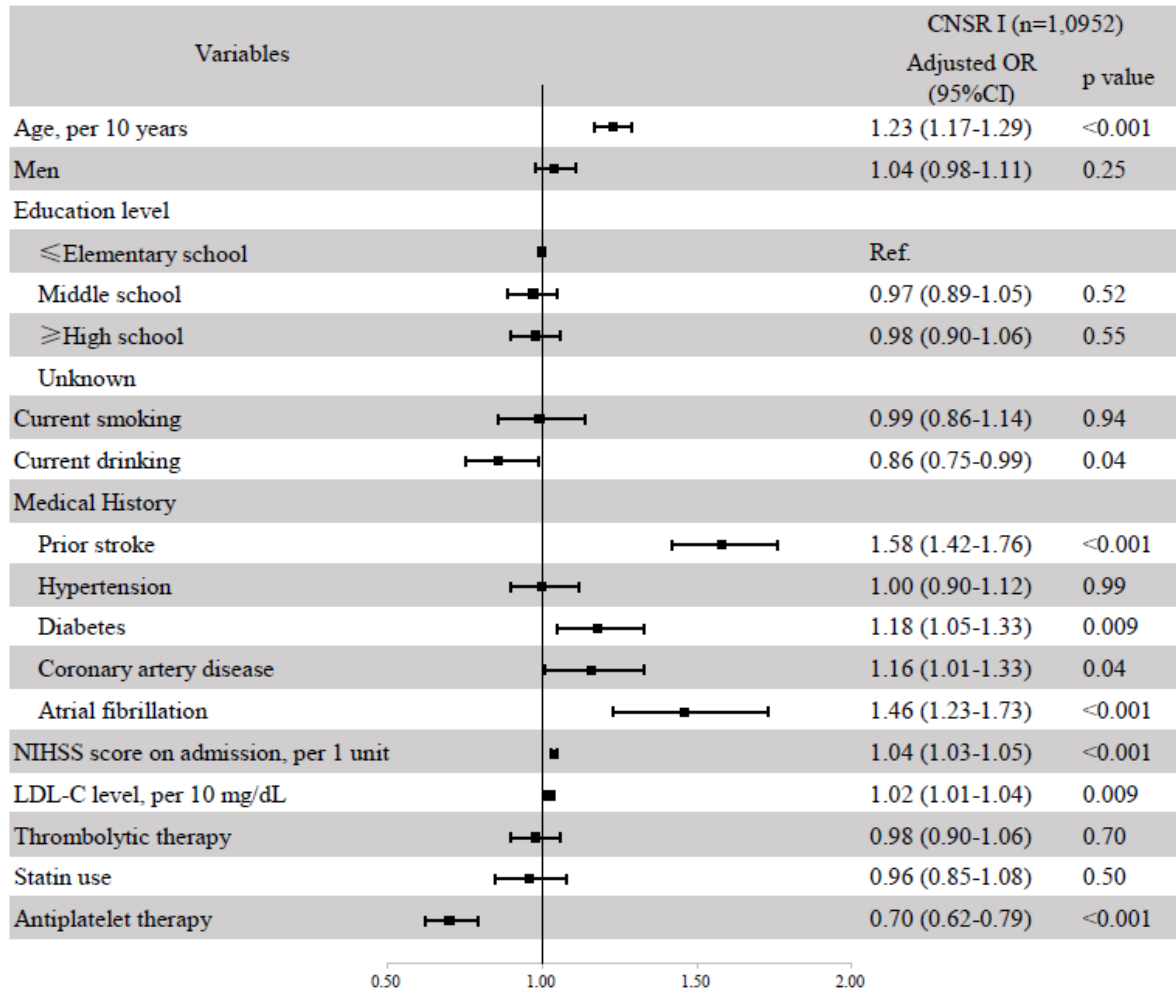



## **eReferences**

1. Amarenco P, Bogousslavsky J, Callahan A, 3rd, Goldstein LB, Hennerici M, Rudolph AE, et al. High-dose atorvastatin after stroke or transient ischemic attack. *The New England journal of medicine*. 2006;355(6):549-59.
